# Supplementary material
Source: PubMed Central journal article supplement (PMC4286310)
Supplement: NIHMS639086-supplement-Supplemental_Digital_Content.pdf [file NIHMS639086-supplement-Supplemental_Digital_Content.pdf]

**Appendix. Pregnancy Outcome Questionnaire**

|                                                      |                                                                   |
|------------------------------------------------------|-------------------------------------------------------------------|
| Severe Chronic Neutropenia<br>International Registry | Patient ID Number: ___/___/___/___/___<br>Patient Initials: _____ |
|------------------------------------------------------|-------------------------------------------------------------------|

**PREGNANCY # \_\_\_\_\_ OUTCOME** (Complete page for each pregnancy)

Miscarriage/termination, date \_\_\_/\_\_\_/\_\_\_ Gestational Age: \_\_\_\_\_ weeks  
 Please specify:  elective termination or  spontaneous  
 Check reason and describe on back of form:  mother's medical condition  
 abnormal fetal development  
 other \_\_\_\_\_

Still birth, date \_\_\_/\_\_\_/\_\_\_ Gestational Age: \_\_\_\_\_ weeks  
 Specify reason, if known: \_\_\_\_\_

Live birth, date \_\_\_/\_\_\_/\_\_\_ Initials: \_\_\_\_\_  Male  Female  
 Weight: \_\_\_\_\_ Gestational Age: \_\_\_\_\_ weeks  
 CBC (newborn) checked?  No  Yes  
 Normal  
 Neutropenia  Transient  
 Chronic

Complications (newborn)?  No  Yes, describe on back of form.  
 Congenital abnormalities  
 Other medical diagnoses

Complications (maternal)?  No  Yes, describe on back of form.

Mother nursed infant?  No  Yes If yes, cytokine administered to mother?  No  Yes

Cytokine (growth factor, e.g., G-CSF) administered during pregnancy?  No  Yes

If yes, indicate (1) cytokine brand name: \_\_\_\_\_  
 (2) trimester and cytokine dose (circle dose units and indicate frequency.):  
 First trimester, \_\_\_\_\_ [cc] or [ml] or [mcg] or [mcg/kg] \_\_\_\_\_ frequency  
 Second trimester, \_\_\_\_\_ [cc] or [ml] or [mcg] or [mcg/kg] \_\_\_\_\_ frequency  
 Third trimester, \_\_\_\_\_ [cc] or [ml] or [mcg] or [mcg/kg] \_\_\_\_\_ frequency

Mother's weight before pregnancy: \_\_\_\_\_  lb  kg

Did patient stop cytokine treatment?  No  Yes, stop date: \_\_\_\_\_

Boxer LA, Bolyard AA, Kelley ML, Marrero TM, Bond JM, Newburger PE, et al. Use of granulocyte colony–stimulating factor during pregnancy in women with chronic neutropenia. *Obstet Gynecol* 2015;125.

The authors provided this information as a supplement to their article.

If yes, specify reason: \_\_\_\_\_

*Please use the back of this form to provide any additional information about patient or infant.*

06Jan99

Boxer LA, Bolyard AA, Kelley ML, Marrero TM, Bond JM, Newburger PE, et al. Use of granulocyte colony–stimulating factor during pregnancy in women with chronic neutropenia. *Obstet Gynecol* 2015;125.

The authors provided this information as a supplement to their article.
